# Supplementary material
Source: Springer Nature journal article supplement (https://www.springermedizin.de/resource/supplementary/12877_2012_821_MOESM1_ESM.pdf/9440466)
Supplement: MOESM1 [file 9440466]

24 nursing homes in Oppland and Hedmark counties, Norway were invited to participate

11 nursing homes were unwilling to participate

13 nursing homes with 31 wards accepted the invitation

Two wards were unwilling to participate

29 wards with 647 residents were available for the main study

380 residents were excluded:

- Informed consent was not obtained
- Did not fulfil the inclusion/exclusion criteria
- Severely ill

267 residents gave consent to participate and had complete data in the main study

8 nursing homes/ 20 wards / 197 residents were excluded from the current part of study.

- Long distance from hospital
- Nursing homes had already finished data collection in the main study

5 nursing homes / 9 wards / 70 residents were available for this study

- Missing blood sample for vitamin B6 analysis (no 8)
- Missing other important data (no 1)

61 residents participated
